# Supplementary material for: Imagery ability assessments: a cross-disciplinary systematic review and quality evaluation of psychometric properties
Source: Springer Nature journal article supplement (doi:10.1186/s12916-022-02295-3), 2022-05-02
Supplement: MOESM3 [file 20363410]

**Table 1A. Characteristics of the included measurement tools for motor imagery**

| Tool                                                           | Original language | Available translations                            | Construct(s)                                                           | Test format                                         | Mode of administration | Scale/ Subscales (SS)                                           | No. of items                                            | Scoring                                  | Equipment                                                                             | Time needed (Min.) | Comments                                                                                             |
|----------------------------------------------------------------|-------------------|---------------------------------------------------|------------------------------------------------------------------------|-----------------------------------------------------|------------------------|-----------------------------------------------------------------|---------------------------------------------------------|------------------------------------------|---------------------------------------------------------------------------------------|--------------------|------------------------------------------------------------------------------------------------------|
| Florida Praxis Imagery Questionnaire (FPIQ)                    | English           | German                                            | Explicit movement imagery                                              | questionnaire                                       | self-report            | 4 SS, kinaesthetic, position, action and object                 | 48 (12 for each subscale)                               | each question has two possible responses | questionnaire                                                                         | NR                 | -                                                                                                    |
| Imaprax                                                        | English<br>French | German                                            | Motor imagery vividness                                                | Computer and video-based assessment + questionnaire | examiner-administered  | visual                                                          | 6 complex unilateral and bilateral UL gestures or ADL's | 7-point scale                            | Imaprax software, Laptop, chair, questionnaire                                        | 20-25              | -                                                                                                    |
| Kinaesthetic and Visual Imagery Questionnaire (KVIQ-20)        | English           | German<br>Brazilian<br>Portuguese<br>Japanese     | Vividness kinaesthetic and visual motor imagery                        | questionnaire                                       | examiner-administered  | 2 SS, kinaesthetic and visual                                   | 20                                                      | 5-point scale                            | Questionnaire, one chair with backrest for participant and one chair for the examiner | 20-30              | Russian, Spanish, Chinese versions of the KVIQ also exist, but no validation studies were available. |
| Kinaesthetic and Visual Imagery Questionnaire (KVIQ-10)        | English           | German<br>Japanese<br>French                      | Vividness kinaesthetic and visual motor imagery                        | questionnaire                                       | examiner-administered  | 2 SS, kinaesthetic and visual                                   | 10                                                      | 5-point scale                            | Questionnaire, one chair with backrest for participant and one chair for the examiner | 15-20              |                                                                                                      |
| Movement Imagery Questionnaire (MIQ)                           | English           | -                                                 | Vividness kinaesthetic and visual motor imagery                        | questionnaire                                       | self-report            | 2 SS, kinaesthetic and visual                                   | 18                                                      | 7-point scale                            | Questionnaire, calm room, one chair                                                   | NR                 | -                                                                                                    |
| Revised Movement Imagery Questionnaire (MIQ-R)                 | English           | -                                                 | Vividness kinaesthetic and visual motor imagery                        | questionnaire                                       | self-report            | 2 SS, kinaesthetic and visual                                   | 8                                                       | 7-point scale                            | Questionnaire, calm room, one chair                                                   | 10-15              | -                                                                                                    |
| Movement Imagery Questionnaire-Revised second version (MIQ-RS) | English           | French                                            | Vividness kinaesthetic and visual motor imagery                        | questionnaire                                       | self-report            | 2 SS, kinaesthetic and visual                                   | 14                                                      | 7-point scale                            | Questionnaire, calm room, one chair                                                   | 20-25              | -                                                                                                    |
| Movement Imagery Questionnaire-3 (MIQ-3)                       | English           | Slovene<br>Polish<br>French<br>Spanish<br>Turkish | Vividness of external + internal visual and kinaesthetic motor imagery | questionnaire                                       | self-report            | 3 SS, external visual, internal visual and kinaesthetic imagery | 12                                                      | 7-point scale                            | Questionnaire, calm room                                                              | 20-30              | -                                                                                                    |
| Movement Imagery Questionnaire for Children (MIQ-C)            | English           | -                                                 | Vividness of external + internal visual and kinaesthetic motor imagery | questionnaire                                       | self-report            | 3 SS, external visual, internal visual and kinaesthetic imagery | 12                                                      | 7-point scale                            | Questionnaire, calm room                                                              | 30                 | -                                                                                                    |

|                                                                                                                                                                                                                                                                                                                                               |         |        |                                                    |               |             |                                                            |              |                                                                 |                                     |    |                                                                                                                                                                         |
|-----------------------------------------------------------------------------------------------------------------------------------------------------------------------------------------------------------------------------------------------------------------------------------------------------------------------------------------------|---------|--------|----------------------------------------------------|---------------|-------------|------------------------------------------------------------|--------------|-----------------------------------------------------------------|-------------------------------------|----|-------------------------------------------------------------------------------------------------------------------------------------------------------------------------|
| Test of Ability in Movement Imagery (TAMI)                                                                                                                                                                                                                                                                                                    | English | -      | Ability to imagine a series of movement imagery    | questionnaire | self-report | No SS                                                      | 10 questions | Only correct answers will be scored 0-10                        | Questionnaire, calm room            | 10 | TAMI-weighted (TAMIw): new scoring method was introduced. More difficult questions were weighted more heavily than relatively easier questions. TAMIw Max. Score is 24. |
| Test of Ability in Movement Imagery with Hands (TAMI-H)                                                                                                                                                                                                                                                                                       | English | -      | Ability to imagine hand movements                  | questionnaire | self-report | 2 SS, Functionally-involved movement and Isolated movement | 44 questions | Only correct answers in a multiple-choice format will be scored | Questionnaire, calm room, one chair | NR | The questionnaire was divided into 4 booklets: 2 tested the imagined movements of the right hand and the other 2 tested imagined movements of the left hand.            |
| Vividness of Movement Imagery Questionnaire (VMIQ)                                                                                                                                                                                                                                                                                            | English | -      | Vividness kinaesthetic and visual movement imagery | questionnaire | self-report | 2 SS, kinaesthetic and visual                              | 24           | 5-point scale                                                   | Questionnaire, calm room            | NR | -                                                                                                                                                                       |
| Vividness of Haptic Movement Imagery Questionnaire (VHMIQ)                                                                                                                                                                                                                                                                                    | English | -      | Vividness of haptic visual imagery                 | questionnaire | self-report | Only visual imagery                                        | 24           | 5-point scale                                                   | Questionnaire, calm room            | NR | Campos et al. 1998 provided an English version of VHMIQ as Appendix. But it is not clear whether a Spanish version is also available.                                   |
| Revised Vividness of Movement Imagery Questionnaire-2 (VMIQ-2)                                                                                                                                                                                                                                                                                | English | German | Vividness kinaesthetic and visual movement imagery | questionnaire | self-report | 3 SS, external, internal, kinaesthetic                     | 12           | 5-point scale                                                   | Questionnaire, calm room            | NR | -                                                                                                                                                                       |
| Wheelchair Imagery Ability Questionnaire (WIAQ)                                                                                                                                                                                                                                                                                               | English | -      | Imagery ability by athletes with a disability      | questionnaire | self-report | 3 SS, external, internal, kinaesthetic                     | 24           | 5-point scale                                                   | Questionnaire, calm room            | NR | -                                                                                                                                                                       |
| <b>Abbreviations:</b> Min.=minutes; NR=not reported; UL=upper limb; ADL=activities of daily living; external=external perspective subscale; internal=internal perspective subscale; Functionally-involved movement=imagery of hand movements interacting with objects; Isolated movement=imagery of hand movements in the absence of objects; |         |        |                                                    |               |             |                                                            |              |                                                                 |                                     |    |                                                                                                                                                                         |
