# Supplementary material for: Imagery ability assessments: a cross-disciplinary systematic review and quality evaluation of psychometric properties
Source: Springer Nature journal article supplement (doi:10.1186/s12916-022-02295-3), 2022-05-02
Supplement: MOESM4 [file 20363410]

**Table 2A. Motor imagery assessments: Summary of Findings using modified GRADE**

| <b>Structural validity</b>                                                   | <b>Summary of results</b>                                                                                                                                                                                                                  | <b>Overall rating of each measurement property</b> | <b>Quality of evidence</b>                                                                                  | <b>Comments</b>                                                                                                                                                                                                                               |
|------------------------------------------------------------------------------|--------------------------------------------------------------------------------------------------------------------------------------------------------------------------------------------------------------------------------------------|----------------------------------------------------|-------------------------------------------------------------------------------------------------------------|-----------------------------------------------------------------------------------------------------------------------------------------------------------------------------------------------------------------------------------------------|
| <b>MIQ-R (Monsma et al. 2009, Williams et al. 2012)</b>                      | Bifactorial structure (kinaesthetic and visual) confirmed. Total sample size 725 athletes.                                                                                                                                                 | sufficient                                         | High: both studies with very good methodological quality and consistent results.                            | Results exist only for athletes with a mean age of 20.0 years. Further studies are needed including older populations.                                                                                                                        |
| <b>MIQ-3 (Williams et al. 2012, Budnik-Przybylska et al. 2016)</b>           | The three-factor structure (external, internal and kinaesthetic) confirmed. Total sample size 646 athletes.                                                                                                                                | sufficient                                         | High: both studies with very good methodological quality and consistent results.                            | Results were pooled only for English version. The results for Turkish version seem to be identical. Slovenian, French and Spanish versions indicate insufficient structural validity. Further studies are needed including other populations. |
| <b>VMIQ-2 (Roberts et al. 2008 1 +2)</b>                                     | The three-factor structure (external, internal and kinaesthetic) confirmed. Total sample size 706 athletes.                                                                                                                                | sufficient                                         | High: both studies with very good methodological quality and consistent results.                            | Results of three separate studies were reported in this paper, which allows the summary of results from two studies. The German version was evaluated with students and indicated a sufficient structural validity.                           |
|                                                                              |                                                                                                                                                                                                                                            |                                                    |                                                                                                             |                                                                                                                                                                                                                                               |
| <b>Internal consistency</b>                                                  | <b>Summary of results</b>                                                                                                                                                                                                                  | <b>Overall rating of each measurement property</b> | <b>Quality of evidence</b>                                                                                  | <b>Comments</b>                                                                                                                                                                                                                               |
| <b>MIQ (Hall et al. 1985, Atienza &amp; Balaguer 1994)</b>                   | Cronbach alpha 0.88-0.91 kinaesthetic and 0.87-0.89 visual. Total sample size 190 students.                                                                                                                                                | indeterminate                                      | High: both studies with very good methodological quality for this research question and consistent results. | Lack of evidence for sufficient structural validity. Results exist only for students. Further studies are needed including other populations and population with large age range.                                                             |
| <b>MIQ-R (Monsma et al. 2009, Williams et al. 2012)</b>                      | Cronbach=0.88 respectively CR 0.82 kinaesthetic, Cronbach=0.84 respectively CR=0.88 visual. Total sample size 725 athletes.                                                                                                                | sufficient                                         | High: both studies with very good methodological quality for this research question and consistent results. | Results exist only for athletes with a mean age of 20.0 years. Further studies are needed including older population.                                                                                                                         |
| <b>MIQ-3 (Williams et al. 2012, Budnik-Przybylska et al. 2016)</b>           | Cronbach=0.81 respectively CR=0.85 and CR= 0.89 kinaesthetic, Cronbach=0.78 respectively CR=0.79 and CR=0.81 internal, Cronbach=0.75 respectively CR=0.83 and CR=0.89. Total sample size 743 athletes.                                     | sufficient                                         | High: all studies with very good methodological quality for this research question and consistent results.  | Results exist only for athletes with a mean age of 20.0 years and only for English version of MIQ-3. Further studies are needed including older populations.                                                                                  |
| <b>VMIQ-2 (Williams et al. 2012 1+2 and Roberts et al. 2008<sup>3</sup>)</b> | Cronbach=0.93 respectively CR= 0.93 for kinaesthetic subscale, Cronbach=0.95 respectively CR=0.93 and CR=0.92 for internal subscale, Cronbach=0.95 respectively CR=0.94 and CR=0.93 for external subscale. Total sample size 538 athletes. | sufficient                                         | High: all studies are methodological very good.                                                             | Williams et al. and Roberts et al. reported results of several studies. Results exist only for athletes. Further studies are needed including other populations.                                                                              |
|                                                                              |                                                                                                                                                                                                                                            |                                                    |                                                                                                             |                                                                                                                                                                                                                                               |
| <b>Reliability- test-retest</b>                                              | <b>Summary of results</b>                                                                                                                                                                                                                  | <b>Overall rating of each measurement property</b> | <b>Quality of evidence</b>                                                                                  | <b>Comments</b>                                                                                                                                                                                                                               |

|                                                                                                                                                                                                                                                                                                                                                                                  |                                                                                          |                                                    |                                                                                                                                   |                                                                                                                                                                                                                                                                                                                                                   |
|----------------------------------------------------------------------------------------------------------------------------------------------------------------------------------------------------------------------------------------------------------------------------------------------------------------------------------------------------------------------------------|------------------------------------------------------------------------------------------|----------------------------------------------------|-----------------------------------------------------------------------------------------------------------------------------------|---------------------------------------------------------------------------------------------------------------------------------------------------------------------------------------------------------------------------------------------------------------------------------------------------------------------------------------------------|
| <b>KVIQ-20 (Malouin 2007, Schuster et al. 2012, Randhawa et al. 2010, Tabrizzi et al. 2013)</b>                                                                                                                                                                                                                                                                                  | ICC range 0.75-0.91 for kinaesthetic and 0.77-0.84 for visual. Total 77 stroke patients. | sufficient                                         | Low: three studies are of doubtful quality and one study of inadequate quality. Two studies with small sample size ( $\leq 15$ ). | Different subgroups of patients with neurological but also orthopedical diseases were evaluated. ICC for visual scale was low ( $< 0.70$ ) for MS and PD group in one study and indicated test-retest insufficient of KVIQ for this population. However, this study (Schuster et al. 2012) had very low sample size (N=7 MS and N=8 PD patients). |
|                                                                                                                                                                                                                                                                                                                                                                                  | ICC 0.82- 0.95 for kinaesthetic and 0.68-0.82 for visual. Total 19 PD patients.          | indeterminate                                      |                                                                                                                                   |                                                                                                                                                                                                                                                                                                                                                   |
|                                                                                                                                                                                                                                                                                                                                                                                  | ICC 0.93- 0.95 for kinaesthetic and 0.43-0.85 for visual. Total 22 MS patients.          | indeterminate                                      |                                                                                                                                   |                                                                                                                                                                                                                                                                                                                                                   |
| <b>Construct validity- Hypotheses testing</b>                                                                                                                                                                                                                                                                                                                                    | <b>Summary of results</b>                                                                | <b>Overall rating of each measurement property</b> | <b>Quality of evidence</b>                                                                                                        | <b>Comments</b>                                                                                                                                                                                                                                                                                                                                   |
| <b>VMIQ (Isaac et al. 1986, Eton et al.1998, Lequerica et al. 2002)</b>                                                                                                                                                                                                                                                                                                          | No hypothesis defined. Insufficient information about comparator instrument.             | indeterminate                                      | Very low: two studies with inadequate and one with doubtful methodological quality.                                               | Insufficient information about comparator instrument.                                                                                                                                                                                                                                                                                             |
| <b>TAMI (Madan &amp; Singhal 2013, Madan &amp; Singhal 2014)</b>                                                                                                                                                                                                                                                                                                                 | No hypothesis defined. Insufficient information about comparator instrument.             | indeterminate                                      | Very low: both studies inadequate methodological quality.                                                                         | Insufficient information about comparator instrument.                                                                                                                                                                                                                                                                                             |
| <b>Abbreviations:</b> MIQ=Movement Imagery Questionnaire; MIQ-R=Revised Movement Imagery Questionnaire, MIQ-3=Movement Imagery Questionnaire-3; VMIQ=Vividness of Movement Imagery Questionnaire; VMIQ-2=Revised Vividness of Movement Imagery Questionnaire-2; TAMI=Test of Ability in Movement Imagery; CR=composite reliability; PD=Parkinson disease; MS=Multiple sclerosis; |                                                                                          |                                                    |                                                                                                                                   |                                                                                                                                                                                                                                                                                                                                                   |
