# Supplementary material for: Imagery ability assessments: a cross-disciplinary systematic review and quality evaluation of psychometric properties
Source: Springer Nature journal article supplement (doi:10.1186/s12916-022-02295-3), 2022-05-02
Supplement: MOESM5 [file 20363410]

**Table 3A. Characteristics of the included measurement tools for mental imagery**

| <b>a. General mental imagery assessment (measuring imagery in any sensorial modality)</b> |                          |                               |                                                         |                    |                               |                                                                                                                                   |                                |                |                                           |                           |                                                                      |
|-------------------------------------------------------------------------------------------|--------------------------|-------------------------------|---------------------------------------------------------|--------------------|-------------------------------|-----------------------------------------------------------------------------------------------------------------------------------|--------------------------------|----------------|-------------------------------------------|---------------------------|----------------------------------------------------------------------|
| <b>Tool</b>                                                                               | <b>Original language</b> | <b>Available translations</b> | <b>Construct(s)</b>                                     | <b>Test format</b> | <b>Mode of administration</b> | <b>Scale/ Subscale (SS)</b>                                                                                                       | <b>No. of items/ Questions</b> | <b>Scoring</b> | <b>Equipment</b>                          | <b>Time needed (Min.)</b> | <b>Comments</b>                                                      |
| Auditory Imagery Scale (AIS)                                                              | English                  | Spanish                       | Vividness of auditory imagery                           | questionnaire      | self-administered             | 1 SS                                                                                                                              | 7                              | 4-point scale  | questionnaire                             | NR                        | -                                                                    |
| Auditory Imagery Questionnaire (AIQ)                                                      | English                  | Spanish                       | Vividness of auditory imagery                           | questionnaire      | self-administered             | 1 SS                                                                                                                              | 12                             | 5-point scale  | questionnaire                             | 20-30 Min.                | -                                                                    |
| Bucknell Auditory Imagery Scale (BAIS)                                                    | English                  | none                          | Vividness and control of auditory imagery               | questionnaire      | self-administered             | 2 SS, control and vividness                                                                                                       | 14                             | 7-point scale  | questionnaire                             | NR                        | -                                                                    |
| Betts Questionnaire Upon Mental Imagery (original QUMI)                                   | English                  | none                          | Vividness of mental imagery in any sensorial modality   | questionnaire      | self-administered             | 7 SS, visual, auditory, cutaneous, kinaesthetic, gustatory, olfactory, organic                                                    | 150                            | 7-point scale  | questionnaire                             | NR                        | Betts developed QUMI but did not evaluate psychometric properties.   |
| Betts Questionnaire Upon Mental Imagery (shorted, SQMI)                                   | English                  | Spanish Italian               | Vividness of mental imagery in any sensorial modality   | questionnaire      | self-administered             | 7 SS, visual, auditory, cutaneous, kinaesthetic, gustatory, olfactory, organic                                                    | 35                             | 7-point scale  | questionnaire                             | 55 Min.                   | Evaluated with students only.                                        |
| Clarity of Auditory Imagery Scale (CAIS)                                                  | English, Swedish         | Spanish Polish                | Clarity of auditory imagery                             | questionnaire      | self-administered             | 1 SS                                                                                                                              | 16                             | 5-point scale  | questionnaire                             | NR                        | -                                                                    |
| Gordon Test of Visual imagery control (GTVIC)                                             | English                  | Spanish French                | Controllability of visual imagery                       | questionnaire      | self-administered             | No SS                                                                                                                             | 12                             | 3-point scale  | questionnaire                             | NR                        | -                                                                    |
| Imaging Ability Questionnaire (IAQ)                                                       | English                  | none                          | Ability to image and to experience those images         | questionnaire      | self-administered             | 2 SS, absorption and image generation                                                                                             | 54                             | 5-point scale  | questionnaire                             | NR                        | Short version consists of 34 items, scoring 0-4. Time needed 10 Min. |
| Imagery Questionnaire by Lane                                                             | English                  | none                          | Control of imagery                                      | questionnaire      | self-administered             | 7 SS, visual, auditory, cutaneous, kinaesthetic, gustatory, olfactory, organic                                                    | 35                             | 5-point scale  | questionnaire                             | NR                        | -                                                                    |
| Kids Imaging Ability Questionnaire (KIAQ)                                                 | English                  | none                          | Ability to image and to experience those images         | questionnaire      | self-administered             | 2 SS, absorption and image generation                                                                                             | 17                             | 3-point scale  | questionnaire                             | 10 Min.                   | -                                                                    |
| Mental imagery Scale (MIS)                                                                | Italian                  | none                          | Process of generation and qualities of a mental imagery | questionnaire      | self-administered             | 6 SS, Image Formation Speed, Permanence/Stability, Dimensions, Level of Detail and Grain, Distance, Depth of Field or Perspective | 33                             | 5-point scale  | questionnaire and separate page with text | NR                        | -                                                                    |

|                                                                    |         |         |                                                                                                                          |                                   |                       |                                                                                       |    |                             |               |         |                                                                                                                                                          |
|--------------------------------------------------------------------|---------|---------|--------------------------------------------------------------------------------------------------------------------------|-----------------------------------|-----------------------|---------------------------------------------------------------------------------------|----|-----------------------------|---------------|---------|----------------------------------------------------------------------------------------------------------------------------------------------------------|
| Plymouth sensory imagery Questionnaire (Psi-Q)                     | English | none    | Vividness of mental imagery across sensory modalities                                                                    | questionnaire                     | self-administered     | 7 SS, visual, auditory, olfactory, taste, touch, bodily sensation, emotional feelings | 35 | 11-point scale              | questionnaire | NR      | -                                                                                                                                                        |
| Sport Imagery Ability Measure (SIAM)                               | English | none    | Five imagery dimensions: vividness, control, ease, speed, duration                                                       | questionnaire                     | self-administered     | 6 SS, visual, auditory, kinaesthetic, olfactory, gustatory, tactile, emotion          | 72 | 10-cm analogue scales       | questionnaire | NR      | -                                                                                                                                                        |
| Revised Sport Imagery Ability Measure (SIAM)                       | English | none    | Five imagery dimensions: vividness, control, ease, speed, duration                                                       | questionnaire                     | self-administered     | 6 SS, visual, auditory, kinaesthetic, olfactory, gustatory, tactile, emotion          | 48 | 10-cm analogue scales       | questionnaire | NR      | -                                                                                                                                                        |
| Sport Imagery Ability Questionnaire (SAIQ)                         | English | none    | Athletes ease and vividness of imaging on different content: cognitive specific, motivational specific, general imagery, | questionnaire                     | self-administered     | 4 SS, skill, strategy, goal and affect                                                | 20 | 7-point scale               | questionnaire | NR      | First version 35 items. Short version with 12 items and a modified version with 15 items available. Scoring and subscales are the same for each version. |
| Survey of mental imagery                                           | English | French  | Vividness and controllability of mental imagery                                                                          | questionnaire, two forms: A and B | self-administered     | 7 SS, visual, auditory, olfactory, gustatory, tactile, somesthetic, kinaesthetic      | 86 | vividness: 1-5 control: 1-3 | questionnaire | 20 Min. | -                                                                                                                                                        |
| Visual Elaboration Scale (VES)                                     | English | none    | Visual imagery ability- differences in visualisation                                                                     | questionnaire                     | examiner-administered | 4 scenes                                                                              | 15 | 0-15 points                 | questionnaire | NR      | -                                                                                                                                                        |
| Vividness of Olfactory Imagery Questionnaire (VOIQ)                | English | none    | Vividness of olfactory imagery                                                                                           | questionnaire                     | self-administered     | 1 SS                                                                                  | 16 | 5-point scale               | questionnaire | NR      | -                                                                                                                                                        |
| Vividness of Object and Spatial Imagery Questionnaire (VOSI)       | NR      | English | Vividness object and spatial imagery                                                                                     | questionnaire                     | self-administered     | 2 SS, spatial and object imagery                                                      | 28 | 5-point scale               | questionnaire | NR      | Questionnaire only available in English. No information in what language the VOSI was developed.                                                         |
| Vividness of Visual Imagery Questionnaire (VVIQ)                   | English | Spanish | Vividness visual imagery                                                                                                 | questionnaire                     | self-administered     | No SS, eyes open and closed version                                                   | 16 | 5-point scale               | questionnaire | NR      | -                                                                                                                                                        |
| Revised version Vividness of Visual Imagery Questionnaire (VVIQ-2) | English | Spanish | Vividness visual imagery                                                                                                 | questionnaire                     | self-administered     | No SS                                                                                 | 32 | 5-point scale               | questionnaire | NR      | -                                                                                                                                                        |

|                                                                     |         |         |                                                              |                             |                   |                                                                                                        |             |                                                        |                                                  |            |                                                                                                         |
|---------------------------------------------------------------------|---------|---------|--------------------------------------------------------------|-----------------------------|-------------------|--------------------------------------------------------------------------------------------------------|-------------|--------------------------------------------------------|--------------------------------------------------|------------|---------------------------------------------------------------------------------------------------------|
| Vividness of Visual Imagery Questionnaire-Revised version (VVIQ-RV) | English | Spanish | Vividness visual imagery                                     | questionnaire               | self-administered | No SS                                                                                                  | 32          | 7-point scale                                          | questionnaire                                    | NR         | -                                                                                                       |
| Vividness of Visual Imagery Questionnaire-Modified (VVIQ-M)         | English | none    | Vividness visual imagery                                     | questionnaire               | self-administered | No SS                                                                                                  | 16          | 7-point scale                                          | questionnaire                                    | NR         | -                                                                                                       |
| Vividness of Wine Imagery Questionnaire (VWIQ)                      | English | none    | Vividness of mental imagery of wine                          | questionnaire               | self-administered | Six different scenarios: vineyard, restaurant, bistro, a relaxing night at home, and two wine tastings | 18          | 5-point scale                                          | questionnaire                                    | NR         | The questionnaire could be a useful measure of individual wine experience for use in the wine industry. |
| <b>b. Assessments of spatial imagery- mental rotation</b>           |         |         |                                                              |                             |                   |                                                                                                        |             |                                                        |                                                  |            |                                                                                                         |
| Card Rotation Test                                                  | English | none    | Ability and speed to rotate mental images                    | questionnaire               | self-administered | No SS                                                                                                  | 10          | 2 choice correct and incorrect                         | questionnaire                                    | 3 Min.     | -                                                                                                       |
| Cube-Cutting Task (CCT)                                             | English | none    | Ability of mental manipulation and requires image generation | questionnaire               | self-administered | No SS                                                                                                  | 3           | 0-3                                                    | questionnaire                                    | NR         | -                                                                                                       |
| German Test of the Controllability of Motor Imagery (TKBV)          | German  | none    | Ability to manipulate mental imagined one body part          | questionnaire               | self-administered | 2 SS, Recognition and Free recall                                                                      | 20          | 0-70 points (high scores= good ability)                | questionnaire with pictures                      | 60 Min.    | -                                                                                                       |
| Hand laterality task                                                | German  | none    | Ability to rotate mental images and left-right decision      | questionnaire               | self-administered | No SS                                                                                                  | 128 trials  | 0-128                                                  | questionnaire with pictures                      | 15 Min.    | Four different pictures: a hand, a foot, a face of woman, a car.                                        |
| Judgement test of foot and trunk laterality                         | Swedish | none    | Ability to rotate mental images and left-right decision      | Web-based questionnaire     | self-administered | No SS                                                                                                  | 60 pictures | Max. 60 (range 0-60)                                   | Computer and specific software Recognise Online™ | NR         | 60 pictures of trunk and foot to determine left or right.                                               |
| Map Rotation Ability Test (MRAT)                                    | Spanish | English | Ability to rotate a map                                      | questionnaire with pictures | self-administered | Maps rotated either at 0°, 90°, or 180°                                                                | 30          | correct responses minus incorrect responses: 30 to -30 | questionnaire with pictures (maps)               | 2 Min.     | -                                                                                                       |
| Mental Paper Folding                                                | English | none    | Measure of mental manipulation                               | paper-and-pencil test       | self-administered | No SS                                                                                                  | 10          | Each items was rated as correct or incorrect           | questionnaire                                    | 45-60 Min. | -                                                                                                       |

|                                                                                           |         |         |                                                                                                                                                                                                            |                                                      |                   |                                                            |             |                                                        |                                                  |         |                                                                      |
|-------------------------------------------------------------------------------------------|---------|---------|------------------------------------------------------------------------------------------------------------------------------------------------------------------------------------------------------------|------------------------------------------------------|-------------------|------------------------------------------------------------|-------------|--------------------------------------------------------|--------------------------------------------------|---------|----------------------------------------------------------------------|
| Mental Rotation of Three-Dimensional Objects                                              | English | none    | Measure of three-dimensional spatial visualization ability                                                                                                                                                 | Paper-and-pencil test of spatial visualization       | self-administered | No SS                                                      | 20          | 2 choice correct and two incorrect per item            | questionnaire                                    | 10Min.  | There is another version with 24 items.                              |
| Measure of the Ability to Form Spatial Mental Imagery (MASMI)                             | Spanish | none    | Ability to form spatial imagery                                                                                                                                                                            | paper-and-pencil test                                | self-administered | No SS                                                      | 23          | Each question multiple choices, lowest -46, highest 46 | questionnaire                                    | 10 Min. | -                                                                    |
| Measure of the Ability to Rotate Mental Images (MARMI)                                    | Spanish | none    | Ability to rotate mental images (spatial imagery ability)                                                                                                                                                  | questionnaire                                        | self-administered | No SS                                                      | 23          | Max. 46 (range: -46-46)                                | questionnaire                                    | 10 Min. | Each question has four options to answer: 2 correct and 2 incorrect. |
| Shoulder specific left right judgement task (LRJT)                                        | English | none    | Ability to rotate mental images and left-right decision                                                                                                                                                    | Web-based questionnaire                              | self-administered | No SS                                                      | 40 pictures | 0-40                                                   | Computer and specific software Recognise Online™ | NR      | -                                                                    |
| Spatial Orientation Skills Test (SOST)                                                    | Spanish | English | Ability to orientate oneself on map                                                                                                                                                                        | Map with a black point, which indicates the location | self-administered | Ten pairs are positioned at 0°, 10 at 90°, and 10 at 180°. | 30          | correct responses minus incorrect responses: 30 to -30 | Map with the mark (black point)                  | 2 Min.  | -                                                                    |
| <b>c. Assessments of mental imagery to distinguish between different types of imagers</b> |         |         |                                                                                                                                                                                                            |                                                      |                   |                                                            |             |                                                        |                                                  |         |                                                                      |
| Object-Spatial Imagery Questionnaire (OSIQ)                                               | English | none    | Designed to distinguish between: 1) object imagers who prefer to use object imagery<br>2) spatial imagers who prefer to use a spatial imagery                                                              | questionnaire                                        | self-administered | 2 SS, spatial and object imagery                           | 30          | 5-point scale                                          | questionnaire                                    | NR      | -                                                                    |
| Object-Spatial Imagery and Verbal Questionnaire (OSVIQ)                                   | English | none    | Designed to distinguish between: 1) object imagers who prefer to use object imagery<br>2) spatial imagers who prefer to use a spatial imagery,<br>3) verbalizers who prefer to use verbal-analytical tools | questionnaire                                        | self-administered | 3 SS, spatial, object and verbal                           | 45          | 5-point scale                                          | questionnaire                                    | NR      | -                                                                    |
| Pavio's Individual Differences Questionnaire (IDQ, 86-items)                              | English | none    | Verbal and imaginal habits, preferences and abilities                                                                                                                                                      | questionnaire                                        | self-administered | 2 SS, verbal and imaginal                                  | 86          | true-falsh                                             | questionnaire                                    | NR      | Original version.                                                    |

|                                                                      |         |                 |                                                                        |               |                   |                                                                                                                                |    |               |               |         |                                                   |
|----------------------------------------------------------------------|---------|-----------------|------------------------------------------------------------------------|---------------|-------------------|--------------------------------------------------------------------------------------------------------------------------------|----|---------------|---------------|---------|---------------------------------------------------|
| Revised Pavio's Individual Differences Questionnaire (IDQ, 34-items) | English | none            | Verbal and imaginal habits, preferences and abilities                  | questionnaire | self-administered | 2 SS, verbal and imaginal                                                                                                      | 34 | true-falsh    | questionnaire | NR      | This version was revised by Kardash 1986.         |
| Pavio's Individual Differences Questionnaire (shorted IDQ, 72-items) | English | none            | Verbal and imaginal habits, preferences and abilities                  | questionnaire | self-administered | 2 SS, verbal and imaginal                                                                                                      | 72 | true- falsh   | questionnaire | NR      | This version was revised by Hiscock 1978.         |
| Sussex Cognitive Styles Questionnaire (SCSQ)                         | English | none            | Visual and verbal processing preferences                               | questionnaire | self-administered | 6 SS, Imagery Ability Technical / Spatial Language & Word Forms Need for Organisation Global Bias Systemising Tendency         | 84 | 5-point scale | questionnaire | NR      | -                                                 |
| Verbalizer-Visualizer Questionnaire (VVQ)                            | English | German, Spanish | Distinguish between visualizer and verbalizer                          | questionnaire | self-administered | 2 SS, verbal and visual                                                                                                        | 15 | yes- no       | questionnaire | NR      | -                                                 |
| <b>d. Assessments of use of mental imagery</b>                       |         |                 |                                                                        |               |                   |                                                                                                                                |    |               |               |         |                                                   |
| Children's Active Play Imagery Questionnaire (CAPIQ)                 | English | Persian         | Frequency of imagination by children                                   | questionnaire | self-administered | No SS                                                                                                                          | 11 | 5-point scale | questionnaire | NR      | -                                                 |
| Exercise Imagery Questionnaire-Aerobic Version EIQ-AV                | English | none            | Use of exercise imagery                                                | questionnaire | self-administered | 3 SS, Appearance, Energy, and Technique                                                                                        | 9  | 9-point scale | questionnaire | 10 Min. | First version consisted of 23-items.              |
| Sport Imagery Questionnaire (SIQ)                                    | English | none            | Use of mental imagery in relation to cognitive and motivational issues | questionnaire | self-administered | 5 SS, cognitive general, cognitive specific, motivational specific, motivational general arousal, motivational general mastery | 30 | 7-point scale | questionnaire | NR      | First version consisted of 46-items and 4 scales. |
| Sport Imagery Questionnaire for Children (SIQ-C)                     | English | none            | Use of mental imagery in relation to cognitive and motivational issues | questionnaire | self-administered | 5 SS, cognitive general, cognitive specific, motivational specific, motivational general arousal, motivational general mastery | 21 | 5-point scale | questionnaire | NR      | -                                                 |
| Spontaneous Use of Imagery Scale (SUIS)                              | English | Dutch German    | Frequency and likelihood of use of mental imagery in daily life        | questionnaire | self-administered | No SS                                                                                                                          | 12 | 5-point scale | questionnaire | NR      | -                                                 |
| <b>Abbreviations:</b> Min.=minutes; Max.= Maximum; NR= not reported; |         |                 |                                                                        |               |                   |                                                                                                                                |    |               |               |         |                                                   |
